# Supplementary material for: GmAux/IAA16 Exerts a Positive Regulatory Role in Enhancing Low-P Stress Tolerance in Plants
Source: Research Square preprint supplement (doi:10.21203/rs.3.rs-7686671/v1), 2025-12-15
Supplement: Supplementary file 1 [file 34bff3390560af3d0f072d6e.xlsx]

## Sheet: Sheet1
Table S1 Statistics of sequencing data from samples
Sample	Raw Reads	Raw Base	GC Content(%)	Q20(%)	Q30(%)
NP-WT-R-0h	24593335	7.378	43.755	97.575	94.245
NP-WT-R-0h	26598220	7.979	43.385	97.565	94.15
NP-WT-R-0h	27479931	8.244	43.56	97.91	95.065
NP-WT-R-24h	22213192	6.664	44.03	98.1	95.57
NP-WT-R-24h	28436127	8.531	43.88	98.415	96.355
NP-WT-R-24h	30024933	9.008	43.895	98.105	95.71
NP-16-R-0h	24274025	7.282	42.105	98.425	95.84
NP-16-R-0h	24292012	7.288	42.03	98.345	95.585
NP-16-R-0h	24343410	7.303	41.92	98.545	96.135
NP-16-R-24h	26198219	7.859	44.595	98.16	95.775
NP-16-R-24h	27451135	8.235	44.565	98.15	95.86
NP-16-R-24h	31435813	9.431	44.525	98.215	95.9
LP-WT-R-0h	21820411	6.546	44.325	97.815	94.76
LP-WT-R-0h	22257451	6.677	44.2	97.955	95.155
LP-WT-R-0h	23814721	7.144	44.33	98.03	95.365
LP-WT-R-24h	24012755	7.204	44.33	97.95	95.175
LP-WT-R-24h	24546108	7.364	44.065	98.14	95.63
LP-WT-R-24h	28110646	8.433	44.31	97.91	95.14
LP-16-R-0h	24357304	7.307	44.07	97.72	94.8
LP-16-R-0h	24695370	7.409	44.105	97.91	95.1
LP-16-R-0h	25160035	7.548	44.135	97.865	94.91
LP-16-R-24h	24658406	7.397	43.845	97.705	94.45
LP-16-R-24h	25032171	7.51	43.93	97.81	94.92
LP-16-R-24h	26161244	7.848	44	97.78	94.74
