# Supplementary material for: GmAux/IAA16 Exerts a Positive Regulatory Role in Enhancing Low-P Stress Tolerance in Plants
Source: Research Square preprint supplement (doi:10.21203/rs.3.rs-7686671/v1), 2025-12-15
Supplement: Supplementary file 2 [file 4dc69f8145abea3f56a2d787.docx]

**Supplemental file 3**


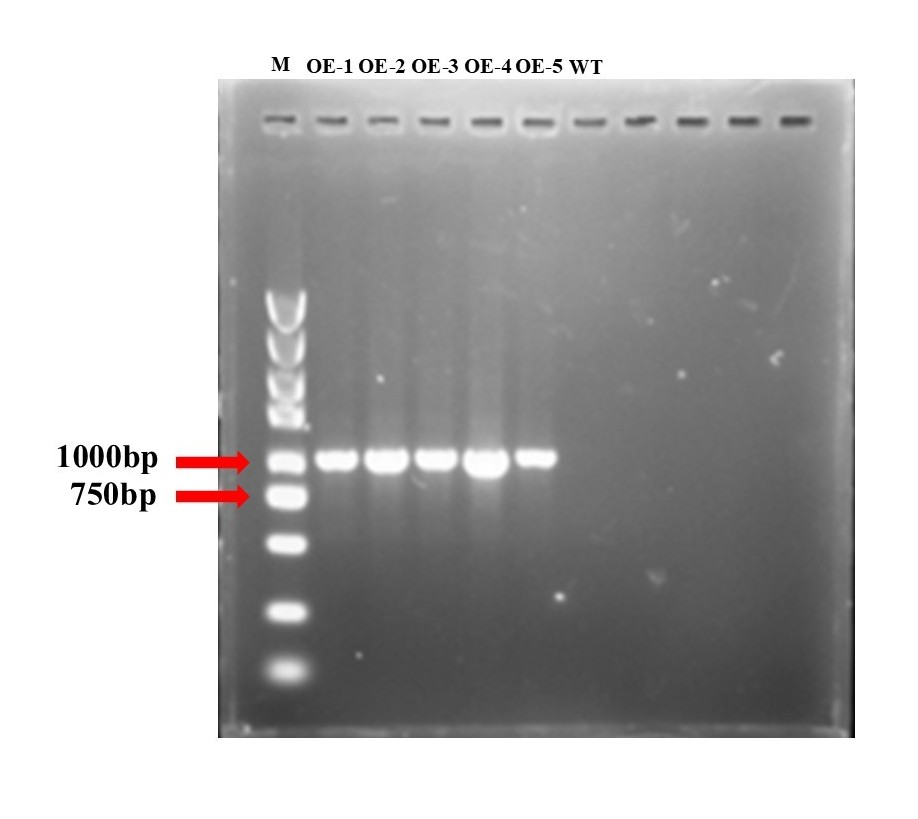


**Fig. S2** PCR analysis of *GmAux/IAA16*-overexpression transgenic tobacco lines.

The *GmAux/IAA16*-overexpressing transgenic tobacco were identified by PCR, and *GmAux/IAA16* gene had a size of 954bp fragment. M, DNA Marker DL5000; WT, wild type tobacco line; OE-1 to 5, independent transgenic tobacco lines
