# Supplementary material for: GmAux/IAA16 Exerts a Positive Regulatory Role in Enhancing Low-P Stress Tolerance in Plants
Source: Research Square preprint supplement (doi:10.21203/rs.3.rs-7686671/v1), 2025-12-15
Supplement: Supplementary file 3 [file b55d6d5fd76869fa791d6701.xlsx]

## Sheet: Sheet1
Table S2 Primers used for vector construction and RT-qPCR
Primer name	Sequence
GmAux/IAA16-F	GCAGCGGCCGTCGACATGTGGCAAAGAAGCCACAA
GmAux/IAA16-R	GTTGATTCAGAATTCCTAGTCTTGCTTACTACCA
GmAux/IAA16-F1	ATGTGGCAAAGAAGCCACAAG
GmAux/IAA16-R1	CTAGTCTTGCTTACTACCAAG
qp-GmAux/IAA16-F	CACCACTCACTCTTGGTTGC
qp-GmAux/IAA16-R	GCGGACTTGATTGGAGCTGT
NtActin-F	GAGGCTACTCGTTCACCACTACT
NtActin-R	TTTCGACGTTTCCATTTCCTGCT
