# Supplementary material for: GmAux/IAA16 Exerts a Positive Regulatory Role in Enhancing Low-P Stress Tolerance in Plants
Source: Research Square preprint supplement (doi:10.21203/rs.3.rs-7686671/v1), 2025-12-15
Supplement: Supplementary file 4 [file bba5bc127452f63171213c23.docx]

**Supplemental file 2**


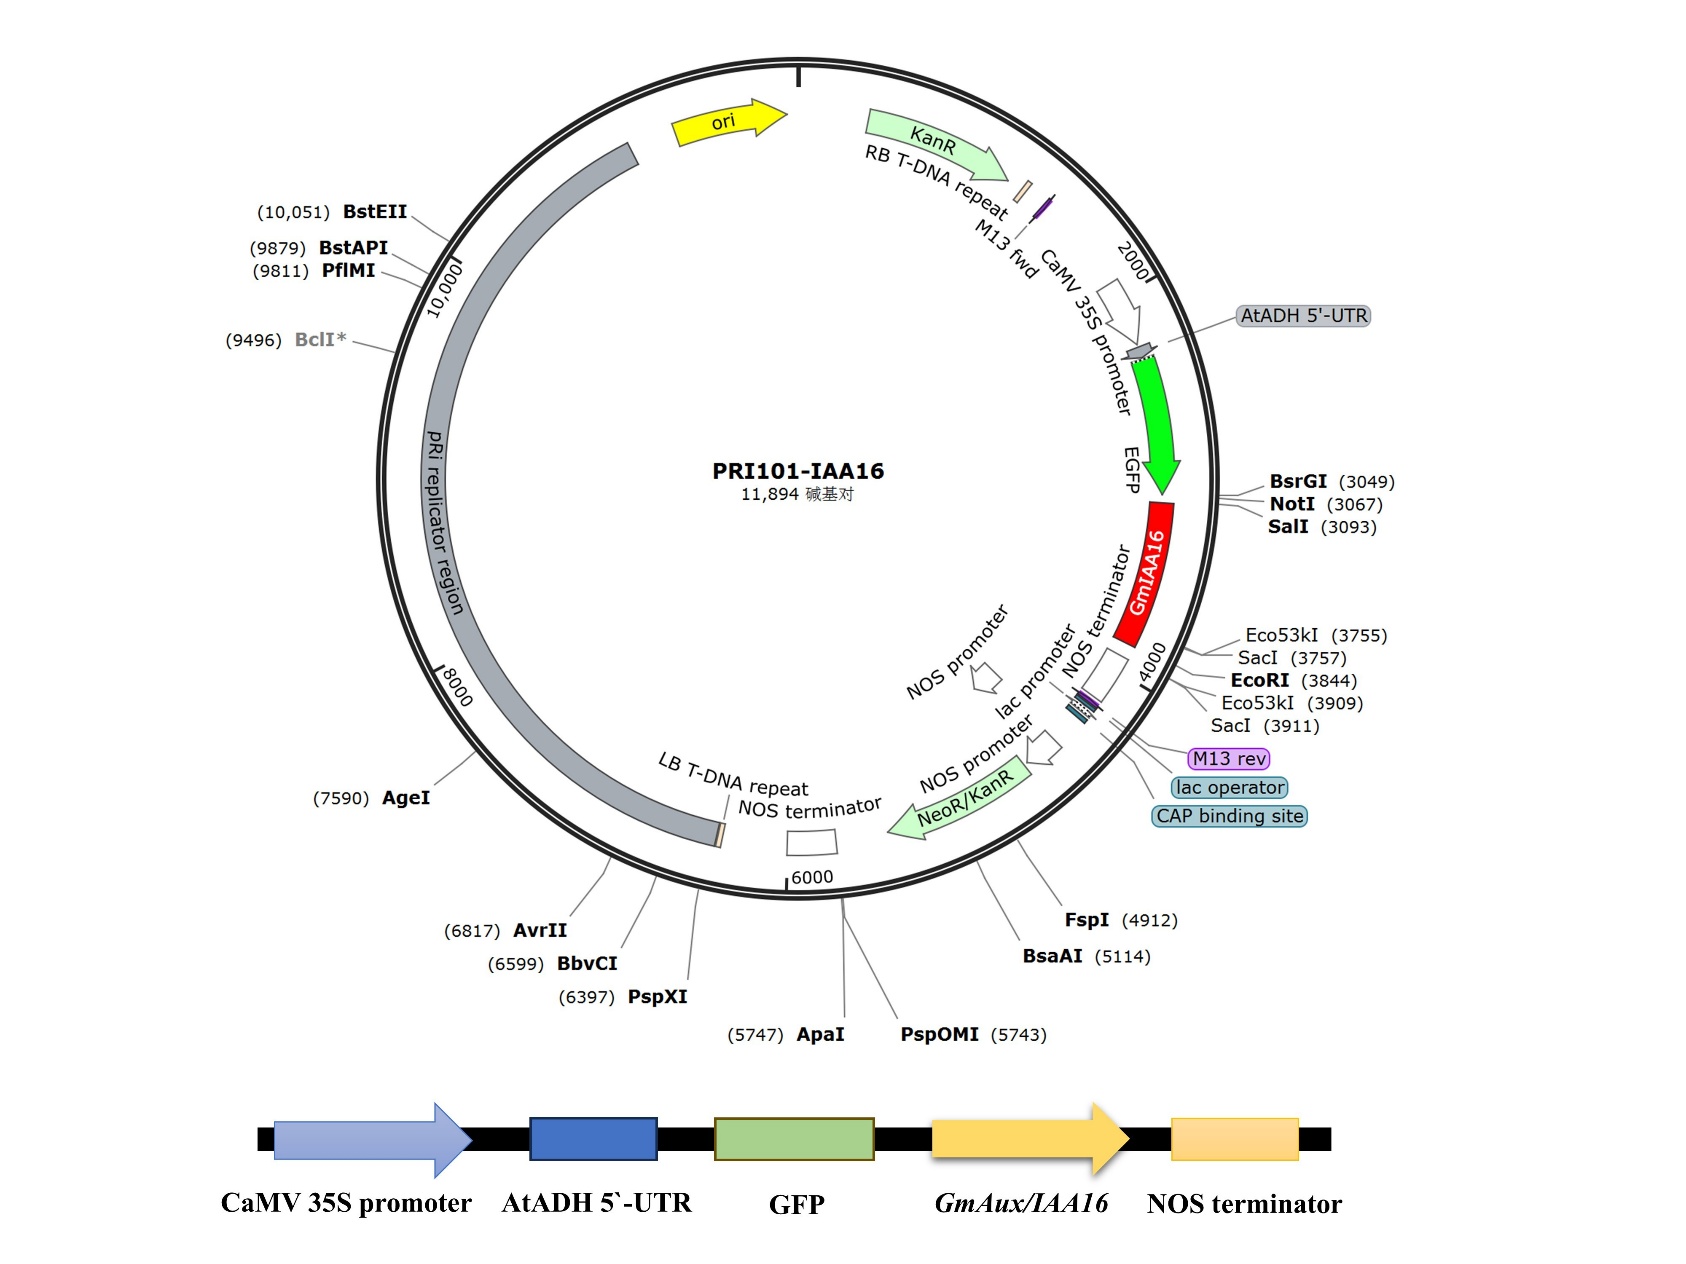


**Fig. S1** Schematic diagram of the carrier used in this study.

The pRI101-GFP vector is used for subcellular localization and tobacco gene transformation
