# Supplementary material for: GmAux/IAA16 Exerts a Positive Regulatory Role in Enhancing Low-P Stress Tolerance in Plants
Source: Research Square preprint supplement (doi:10.21203/rs.3.rs-7686671/v1), 2025-12-15
Supplement: Supplementary file 5 [file f736571cfc0e8ef9662ccc30.docx]

**Supplemental file 1** The protein and RNA sequences generated and analyzed during the current study

>GmAux/IAA16 (XP_003530078.2) auxin-responsive protein IAA16 [*Glycine max*]

MWQRSHKSSEERKLELRLGPPGEESLNESIRKCNRERRRNESPLTLGCFSTQKIFTSDTPGPGGAMLPSAWPSTSYHHQDQAKAKASSFLQLQSSPQNMILMGKDVSQFSCVEKKSFSPSCANPAVSKRTASGPVVGWPPIRSFRKNIASGSTSNSKLPSGSQQQHQNVVPGKVASQKPTDNSGKGLFVKINMDGVAIGRKVDINAYDSYEKLSSAVDELFRGLLAEMKLSHIASSQCCSGQRDSCAGGIQNKEQEEKSNTGLLVGSGEYTLVYEDNEGDRMLVGDVPWHMFVSTVKRLRVLKSSDLPAFTLGSKQD

>GsIAA16 (XP_028245867.1) auxin-responsive protein IAA16-like [*Glycine soja*]

MWQRSHKSSEERKLELRLGPPGEESLNESIRKSNRERNESQFTLGCFSTQNFFTSDKQGPGGTTLPSAWPSTSYHHQHQAKAKASSFLQLQSSPQNMIVMGKDVSQFSCVEKKVFSPSCANPAVSKRTSSGPAVGWPPIRSFRKNIASGSTSKLPSGSHQQHQNVVPYKVASQKPTDKSGKGLFVKINMDGVPIGRKVDINAYDSYEKLSSAVDELFRGLLAEMKLSHIGSSQCCSGQRDSCAGGIQNKEQEEKSNKGLLVGSGEYTLVYEDNEGDRMLVGDVPWHMFVSTVKRLRVLKSSDLPAFTLGSKQD

>SsIAA18 (TKY64440.1) Auxin-responsive protein IAA18 [*Spatholobus suberectus*]

MWQRSHKSSEERKLELRLGPPGEESLNESIKRCNRERNESPLTLGYFSAQKISTSEKPGSGGTMLPSAWPSTSYHQHQAKAKASSFLQLQSSQQNMIVMGRDVPQLCCVEKKAFSPSSANTAGSNRTASGPVVGWPPIRSFRKNIASGSSSKLPSGSQQHPHVAPDKVASKIPTNNSVKGLFVKINMDGVPIGRKVDISAYDSYEKLSSAVDELFRGLLAEMNLSHIFSSPCCSAQRESCAGGIQNKDEEEKANRGLLVGSGEYTLVYEDNEGDKMLVGDVPWHMFVSTVKRLRVLKSCDLPAFTRELESST

>CcIAA2 (XP_020228128.1) auxin-responsive protein IAA2 [*Cajanus cajan*]

MWQRNHKSSEERKLELRLGPPGEESPNESIKKCNRERNESSLTLGYFSTQKISSSDKPGPGGAMLPSAWPSTSYHQHQPKAKASFLQLQSCPKNMIVMGKDVPQLCCVENKTFSPSSANTAVSKRTASGPVVGWPPIRSFRKNIASGSTSKLPSGSHQHQHVVKDKVAGKNSGKGLFVKINMDGVPIGRKVDINAYDSYEKLSSAVDELFRGLLVELNLSHVGSSSCYSGQRDSCAGGNQNKEEEKKANTGLLVGSGEYTLVYEDNEGDRMLVGDVPWHMFVSTVKRVRVLKRSDLPAFTHSSKQN

>ApIAA18-like (XP_027336797.1) auxin-responsive protein IAA18-like isoform X1 [*Abrus precatorius*]

MWQRNHKSSEERKLELRLGPPGEESLNESIKNGNIGRDESSSLPLGYFSTQKISTSDKPGPGGVILPPVWPSTSYHHHSQHQAKASSFLRLPSSPKNMLVMGKDVSQPCCLDLQVAEKKEFRPSSSYTAVSKRNASGPVVGWPPIRSFRKNIASGSSSKLPSGSQQHHQHVVPDKFASHKPTHNSGKGLFVKINMDGVPIGRKVDISAYDSYEKLSSAVDELFRGLLSEMNLSHIISSRCCSAQRDSSASGIQNKEEEEKMNMGLLVGSGEYTLVYEDNEGDRMLVGDVPWHMFVSTVKRLRVLKSCDLPAFTLQLEAST

>PvIAA16 (XP_068479571.1) auxin-responsive protein IAA16-like isoform X2 [*Phaseolus vulgaris*]

MWQRSHRSSEERKLELRLGPPSEESLNGSIKKCFTERNDSPLTLGYSSTHEISTSDKPGPSGAMLTTAWRSTSYHQHQAKPKAPSFFQLQSRPQNMLMMRKEVPQLCCVENMAFSPSSADAAVSKRTASGPVVGWPPIRSFRKNIASGSSSKLPTGSQQHQHVVPDNVASKKPAHNCGKGLFVKINMDGVPIGRKLNINAYNSYEKLSSAVDELFIGLLAEMKLSHIASSQSCSAQRDSSAGGIQNKGEEHKEKANTGLLVGSGDYTLVYEDNEGDSMLVGDVPWHMFVSTVRRLRVLKSSDLPAFTLSSKQD

>*GmAux/IAA16* (PQ963856.1) *Glycine max* clone EHA105 auxin-responsive protein (Aux/IAA16) mRNA, complete cds

ATGTGGCAAAGAAGCCACAAGTCATCAGAGGAGAGGAAGCTGGAGCTTAGGCTTGGTCCACCTGGTGAAGAGTCTCTCAATGAAAGCATCAGAAAATGCAACAGAGAAAGACGTAGAAATGAATCACCACTCACTCTTGGTTGCTTCTCAACTCAGAAAATTTTTACTTCTGACACGCCAGGTCCAGGTGGAGCTATGTTGCCCTCTGCATGGCCTTCCACATCCTATCATCACCAAGACCAGGCTAAAGCTAAAGCTTCATCATTTCTACAGCTCCAATCAAGTCCGCAAAACATGATACTGATGGGAAAGGATGTGTCACAATTCTCTTGTGTAGAGAAGAAGTCATTCTCACCCTCTTGTGCAAATCCAGCGGTGTCCAAAAGAACTGCTTCAGGTCCAGTAGTGGGTTGGCCTCCAATTCGTTCCTTCAGGAAGAACATTGCAAGTGGAAGCACTTCTAATTCTAAGTTGCCTTCTGGGTCCCAGCAGCAACATCAAAATGTTGTTCCAGGCAAGGTTGCTAGCCAAAAACCTACAGACAACTCAGGTAAAGGCTTGTTTGTGAAGATCAATATGGATGGTGTCGCCATTGGGAGAAAAGTGGACATCAATGCTTATGACAGCTATGAAAAACTTTCCTCTGCTGTTGATGAGCTCTTTAGGGGCCTCCTTGCAGAGATGAAGTTATCTCATATTGCCTCTTCCCAATGCTGTTCTGGTCAAAGAGATTCCTGTGCTGGTGGAATTCAAAACAAGGAACAGGAAGAGAAATCCAATACGGGTTTATTGGTTGGAAGTGGGGAATATACTCTTGTTTATGAGGATAATGAAGGAGACAGGATGCTTGTTGGAGATGTGCCGTGGCACATGTTTGTGTCGACAGTGAAGAGGCTGAGGGTGTTGAAGAGTTCTGATCTTCCTGCTTTTACCCTTGGTAGTAAGCAAGACTAG

>*NtActin* (XM_075222114.1) PREDICTED: *Nicotiana tabacum* actin-like (LOC107809974), transcript variant X2, mRNA

GCGTTGGGTTTCATTTGAATTTTTCTTGTTTTTGCATTTGGAACTCATAGCCAACCGTGGGCACCACTAACTAATTCCTCCTACGACCTCTTCCTAAAGCTCCCTGTTTTATACACAAAGATAAAAATGGCAGACGGTGAGGATATTCAGCCACTCGTCTGTGATAATGGGACTGGAATGGTCAAGGCAGGGTTTGCTGGAGATGATGCTCCAAGAGCAGTATTTCCGAGTATTGTTGGTCGCCCACGCCACACAGGTGTGATGGTTGGCATGGGGCAAAAAGATGCATATGTTGGTGATGAAGCTCAATCCAAACGTGGTATTCTAACTTTGAAATATCCAATTGAACATGGTATTGTTAGCAACTGGGATGATATGGAGAAAATCTGGCATCATACATTTTACAACGAACTTCGTGTTGCGCCAGAGGAACACCCTGTACTACTCACTGAAGCACCTCTTAACCCGAAGGCTAATCGCGAAAAGATGACTCAAATCATGTTTGAGACATTTAATACTCCTGCTATGTATGTCGCCATTCAAGCCGTTCTATCCCTTTATGCCAGTGGCCGTACAACAGGTATTGTCCTGGATTCTGGTGATGGTGTTAGCCACACTGTCCCAATTTATGAGGGATATGCTTTGCCACATGCTATCCTCCGTCTTGATTTAGCTGGTCGTGACTTGACTGATCATCTAATGAAAATCTTAACAGAGCGAGGCTACTCGTTCACCACTACTGCTGAACGAGAAATCGTGAGGGATGTGAAGGAAAAACTCTCCTACATTGCTCTTGACTTTGAGCAGGAAATGGAAACGTCGAAAACTAGCTCTTCTGTTGAGAAGAGCTACGAATTGCCCGATGGTCAAGTGATTACCATCGGTGCTGAACGTTTCCGATGCCCTGAAGTCCTTTTCCAACCTTCAATGATTGGAATGGAAGCTGCAGGCATTCACGAAACGACTTATAACTCGATCATGAAGTGCGACGTGGATATCAGAAAGGATCTGTATGGAAATATTGTACTCAGTGGCGGTTCGACTATGTTTCCTGGAATTGCTGATAGGATGAGTAAGGAAATTACTGCCTTAGCTCCAAGCAGTATGAAAATTAAGGTGGTAGCTCCACCTGAGAGGAAGTATAGTGTTTGGATTGGAGGTTCTATTTTGGCTTCTTTAAGTACTTTCCAACAGATGTGGATTGCAAAGGCAGAATATGATGAATCTGGACCATCCATTGTGCACAGAAAATGCTTCTAATTCTTTAGACATGTGATATTTTTATTATGTCTCTTTATCGCTGTAACAATGGCAAACAAAATTTTCAGAATTGACAGTAAAACCAGATACTTCAATGTAGATTTTCTTTTGTTGTGAACTTTTGTCCTTCAATGCTAACTCCAATTGTTTTC
